# Supplementary material for: DNAJB9 Is a Reliable Immunohistochemical Marker of Fibrillary Glomerulonephritis: Evaluation of Diagnostic Efficacy in a Large Series of Kidney Biopsies
Source: MDPI journal article supplement (doi:10.3390/biomedicines10092102), 2022-08-27
Supplement: s1 [file s1]

| Features                                        |          | Glomerular only     | Glomerular and<br>Extraglomerular | p-value      |
|-------------------------------------------------|----------|---------------------|-----------------------------------|--------------|
| Age                                             |          | 53.9 ( $\pm$ 13.51) | 56.71 ( $\pm$ 12.43)              | 0.657        |
| Sex                                             | Male     | 16                  | 21                                | 0.433        |
|                                                 | Female   | 8                   | 17                                |              |
| Creatininemia (mg/dL) ( $\pm$ SD)               |          | 1.74 ( $\pm$ 1.08)  | 2.21 ( $\pm$ 1.74)                | 0.281        |
| Proteinuria (g/die) ( $\pm$ SD)                 |          | 5.46 ( $\pm$ 3.12)  | 4.32 ( $\pm$ 2.45)                | 0.203        |
| Hypertension                                    | Presence | 14                  | 20                                | 0.796        |
|                                                 | Absence  | 10                  | 17                                |              |
| DM                                              | Presence | 1                   | 4                                 | 0.640        |
|                                                 | Absence  | 23                  | 33                                |              |
| Autoimmune disease                              | Presence | 1                   | 8                                 | 0.076        |
|                                                 | Absence  | 23                  | 29                                |              |
| Neoplasia                                       | Presence | 1                   | 3                                 | 0.544        |
|                                                 | Absence  | 23                  | 34                                |              |
| HCV                                             | Presence | 1                   | 3                                 | 0.544        |
|                                                 | Absence  | 23                  | 34                                |              |
| Hematuria                                       | Presence | 14                  | 16                                | 0.159        |
|                                                 | Absence  | 6                   | 17                                |              |
| Membranoproliferative                           | Presence | 1                   | 0                                 | 0.364        |
|                                                 | Absence  | 19                  | 35                                |              |
| Endocapillary proliferative                     | Presence | 4                   | 0                                 | <b>0.014</b> |
|                                                 | Absence  | 16                  | 35                                |              |
| Crescentic                                      | Presence | 4                   | 3                                 | 0.242        |
|                                                 | Absence  | 16                  | 32                                |              |
| Mesangial expansion with<br>no hypercellularity | Presence | 17                  | 32                                | 0.657        |
|                                                 | Absence  | 3                   | 3                                 |              |
| Membranous-like MB-<br>thickening               | Presence | 8                   | 14                                | 0.775        |
|                                                 | Absence  | 12                  | 21                                |              |
| Interstitial fibrosis                           | Presence | 21                  | 31                                | 0.877        |
|                                                 | Absence  | 3                   | 5                                 |              |
| Interstitial inflammation                       | Presence | 18                  | 22                                | 0.404        |
|                                                 | Absence  | 6                   | 12                                |              |
| Fibrils dimension<br>(nm) ( $\pm$ SD)           |          | 20.71 ( $\pm$ 4.07) | 21.10 ( $\pm$ 3.09)               | 0.257        |

Supplementary Table S1. Clinicopathological correlates of DNAJB9 pattern of expression.

| Features                                     |          | Moderate            | Strong               | p-value |
|----------------------------------------------|----------|---------------------|----------------------|---------|
| Age                                          |          | 56.33 ( $\pm$ 8.74) | 56.28 ( $\pm$ 12.05) | 0.595   |
| Sex                                          | Male     | 3                   | 33                   | 0.262   |
|                                              | Female   | 0                   | 25                   |         |
| Creatininemia (mg/dL) ( $\pm$ SD)            |          | 0.77 ( $\pm$ 0.64)  | 2.13 ( $\pm$ 1.56)   | 0.207   |
| Proteinuria (g/die) ( $\pm$ SD)              |          | 6.73 ( $\pm$ 6.57)  | 4.63 ( $\pm$ 2.50)   | 0.205   |
| Hypertension                                 | Presence | 1                   | 33                   | 0.574   |
|                                              | Absence  | 2                   | 24                   |         |
| DM                                           | Presence | 1                   | 4                    | 0.233   |
|                                              | Absence  | 2                   | 53                   |         |
| Autoimmune disease                           | Presence | 0                   | 9                    | 0.455   |
|                                              | Absence  | 3                   | 48                   |         |
| Neoplasia                                    | Presence | 0                   | 4                    | 0.635   |
|                                              | Absence  | 3                   | 53                   |         |
| HCV                                          | Presence | 0                   | 4                    | 0.635   |
|                                              | Absence  | 3                   | 53                   |         |
| Hematuria                                    | Presence | 1                   | 28                   | 0.577   |
|                                              | Absence  | 2                   | 21                   |         |
| Membranoproliferative                        | Presence | 0                   | 1                    | 0.890   |
|                                              | Absence  | 1                   | 52                   |         |
| Endocapillary proliferative                  | Presence | 1                   | 2                    | 0.056   |
|                                              | Absence  | 0                   | 51                   |         |
| Crescentic                                   | Presence | 0                   | 7                    | 0.697   |
|                                              | Absence  | 1                   | 46                   |         |
| Mesangial expansion with no hypercellularity | Presence | 1                   | 47                   | 0.721   |
|                                              | Absence  | 0                   | 6                    |         |
| Membranous-like MB-thickening                | Presence | 0                   | 22                   | 0.403   |
|                                              | Absence  | 1                   | 31                   |         |
| Interstitial fibrosis                        | Presence | 1                   | 51                   | 0.692   |
|                                              | Absence  | 0                   | 8                    |         |
| Interstitial inflammation                    | Presence | 1                   | 39                   | 0.499   |
|                                              | Absence  | 0                   | 18                   |         |
| Fibrils dimension (nm) ( $\pm$ SD)           |          | 22.00 ( $\pm$ 0)    | 21.00 ( $\pm$ 3.56)  | 0.784   |

Supplementary Table S2. Clinicopathological correlates of DNAJB9 stain intensity.

| Features                                     |          | Other FGN            | Congophilic FGN      | p-value |
|----------------------------------------------|----------|----------------------|----------------------|---------|
| Age                                          |          | 56.79 ( $\pm$ 11.97) | 63.00 ( $\pm$ 10.74) | 0.812   |
| Sex                                          | Male     | 29                   | 1                    | 0.305   |
|                                              | Female   | 20                   | 3                    |         |
| Creatininemia (mg/dL) ( $\pm$ SD)            |          | 2.12 ( $\pm$ 1.55)   | 1.90 ( $\pm$ 0.96)   | 0.454   |
| Proteinuria (g/die) ( $\pm$ SD)              |          | 4.42 ( $\pm$ 2.54)   | 4.45 ( $\pm$ 1.53)   | 0.319   |
| Hypertension                                 | Presence | 28                   | 2                    | 0.782   |
|                                              | Absence  | 21                   | 2                    |         |
| DM                                           | Presence | 3                    | 1                    | 0.276   |
|                                              | Absence  | 46                   | 3                    |         |
| Autoimmune disease                           | Presence | 8                    | 1                    | 0.536   |
|                                              | Absence  | 41                   | 3                    |         |
| Neoplasia                                    | Presence | 3                    | 1                    | 0.276   |
|                                              | Absence  | 46                   | 3                    |         |
| HCV                                          | Presence | 3                    | 1                    | 0.276   |
|                                              | Absence  | 46                   | 3                    |         |
| Hematuria                                    | Presence | 22                   | 4                    | 0.121   |
|                                              | Absence  | 20                   | 0                    |         |
| Endocapillary proliferative                  | Presence | 3                    | 0                    | 0.598   |
|                                              | Absence  | 43                   | 4                    |         |
| Crescentic                                   | Presence | 7                    | 0                    | 0.400   |
|                                              | Absence  | 39                   | 4                    |         |
| Mesangial expansion with no hypercellularity | Presence | 40                   | 4                    | 0.441   |
|                                              | Absence  | 6                    | 0                    |         |
| Membranous-like MB-thickening                | Presence | 19                   | 0                    | 0.284   |
|                                              | Absence  | 27                   | 4                    |         |
| Interstitial fibrosis                        | Presence | 45                   | 4                    | 0.467   |
|                                              | Absence  | 6                    | 0                    |         |
| Interstitial inflammation                    | Presence | 33                   | 4                    | 0.303   |
|                                              | Absence  | 16                   | 0                    |         |
| Fibrils dimension (nm) ( $\pm$ SD)           |          | 21.00 ( $\pm$ 3.43)  | 22.67 ( $\pm$ 5.69)  | 0.296   |

Supplementary Table S3. Clinicopathological correlates of congophilic and non-congophilic FGN cases.
